# Supplementary material
Source: Elsevier journal article supplement (https://www.sciencedirect.com/science/article/pii/S1413867020301574)
Supplement: mmc2 [file S1413867020301574:mmc2.docx]

Table S2. *H. pylori* *cag*PAI intactness with histopathological changes of gastric mucosa in patients of different ethnicities

| Histopathological changes | Score | *Malay (n=15) | | Chinese (n=52) | | | Indian (n=19) | | |
| --- | --- | --- | --- | --- | --- | --- | --- | --- | --- |
| Intact  (n=4) | Partial  (n=11) | Intact  (n=11) | Partial  (n=40) | Deleted  (n=1) | Intact  (n=4) | Partial  (n=13) | Deleted  (n=2) |
| *H. pylori* density | 0 | 0 | 1 (9.1) | 5 (45.4) | 10 (25) | 1 (100) | 1 (25) | 2 (15.4) | 0 |
|  | 1 | 3 (75) | 3 (27.3) | 3 (27.3) | 11 (27.5) | 0 | 3 (75) | 7 (53.8) | 1 (50) |
|  | 2 | 1 (25) | 7 (63.6) | 2 (18.2) | 10 (25) | 0 | 0 | 1 (7.7) | 1 (50) |
|  | 3 | 0 | 0 | 1 (9.1) | 9 (22.5) | 0 | 0 | 3 (23.1) | 0 |
|  |  |  |  |  |  |  |  |  |  |
| MNC infiltration | 0 | 0 | 0 | 0 | 1 (2.5) | 0 | 0 | 0 | 0 |
|  | 1 | 2 (50) | 3 (27.3) | 2 (18.2) | 14 (35) | 0 | 1 (25) | 4 (30.8) | 0 |
|  | 2 | 2 (50) | 7 (63.6) | 7 (63.6) | 19 (47.5) | 1 (100) | 3 (75) | 9 (69.2) | 2 (100) |
|  | 3 | 0 | 1 (9.1) | 2 (18.2) | 6 (15) | 0 | 0 | 0 | 0 |
|  |  |  |  |  |  |  |  |  |  |
| Neutrophil activity | 0 | 2 (50) | 0 | 6 (54.5) | 12 (30) | 1 (10) | 1 (25) | 0 | 0 |
|  | 1 | 1 (25) | 8 (72.7) | 4 (36.4) | 12 (30) | 0 | 2 (50) | 12 (92.3) | 1 (50) |
|  | 2 | 1 (25) | 2 (18.2) | 0 | 13 (32.5) | 0 | 1 (25) | 0 | 1 (50) |
|  | 3 | 0 | 1 (9.1) | 1 (9.1) | 3 (7.5) | 0 | 0 | 1 (7.7) | 0 |
|  |  |  |  |  |  |  |  |  |  |
| Intestinal metaplasia | 0 | 3 (75) | 9 (81.2) | 8 (72.7) | 36 (90) | 1 (100) | 3 (75) | 11 (84.6) | 2 (100) |
|  | 1 | 1 (25) | 2 (18.2) | 3 (27.3) | 3(7.5) | 0 | 0 | 1 (7.7) | 0 |
|  | 2 | 0 | 0 | 0 | 1 (2.5) | 0 | 1 (25) | 0 | 0 |
|  | 3 | 0 | 0 | 0 | 0 | 0 | 0 | 1 (7.7) | 0 |
|  |  |  |  |  |  |  |  |  |  |
| Atrophy | 0 | 3 (75) | 8 (72.7) | 7 (63.6) | 33 (82.5) | 1 (100) | 4 (100) | 9 (69.2) | 1 (50) |
|  | 1 | 1 (25) | 3 (27.3) | 2 (18.2) | 3 (7.5) | 0 | 0 | 4 (30.8) | 1 (50) |
|  | 2 | 0 | 0 | 1 (9.1) | 2 (5) | 0 | 0 | 0 | 0 |
|  | 3 | 0 | 0 | 1 (9.1) | 2 (5) | 0 | 0 | 0 | 0 |
|  |  |  |  |  |  |  |  |  |  |

*None of the *H. pylori* from the Malays had deleted *cag*PAI
